# Supplementary material for: Zinc-induced polycrystalline transformation of high-entropy fluorides and derived regulatory mechanisms for bifunctional oxygen electrocatalysis
Source: Royal Society of Chemistry journal article supplement (doi:10.1039/d4ta02866j), 2024-01-01
Supplement: d4ta02866j1.pdf [file d4ta02866j1.pdf]

## Supplementary Information

### **Zinc-Induced Polycrystalline Transformation of High-Entropy Fluorides and Derived Regulatory Mechanisms on Bifunctional Oxygen Electrocatalysis**

Gang Wang<sup>a</sup>, Hao Chi<sup>a</sup>, Yang Feng<sup>b</sup>, Jie Fan<sup>a</sup>, Nanping Deng<sup>a,\*</sup>, Weimin Kang<sup>a,\*</sup>, Bowen Cheng<sup>c,\*</sup>.

*<sup>a</sup> State Key Laboratory of Separation Membranes and Membrane Processes, School of Textile Science and Engineering, Tiangong University, Tianjin, 300387, PR China*

*<sup>b</sup> State Key Laboratory of Advanced Chemical Power Sources, College of Chemistry, Nankai University, Tianjin 300071, PR China*

*<sup>c</sup> School of Material Science and Engineering, Tiangong University, Tianjin 300387, PR China*

---

\* Corresponding author. E-mail addresses: dengnanping@tiangong.edu.cn (N. P. Deng), kangweimin@tiangong.edu.cn (W. M. Kang), bowen15@tiangong.edu.cn (B. W. Cheng)

### ***The calculation method of configurational entropy for fluorides:***

For high-entropy materials (HEM), a high mixing entropy ( $\Delta S_{\text{mix}}$ ) can greatly reduce the system's free energy, ultimately leading to a system with excellent stability[1]. Specifically, the entropies of the system mainly includes configurational entropy ( $\Delta S_{\text{conf}}$ ), vibrational entropy ( $\Delta S_{\text{vib}}$ ), magnetic dipole entropy ( $\Delta S_{\text{mag}}$ ) and electronic randomness entropy ( $\Delta S_{\text{elec}}$ ). Generally, configurational entropy plays a dominant role[2]. The concept of entropy stabilization is also applicable to multi-component compounds, and high-entropy compounds (including high-entropy fluorides) have begun to be gradually developed[3]. The configurational entropy of high-entropy compounds can be obtained according to the following related equations[4]:

$$\Delta S_{\text{mix}} = \Delta S_{\text{conf}} + \Delta S_{\text{vib}} + \Delta S_{\text{mag}} + \Delta S_{\text{elec}} \#(S1)$$

$$\Delta S_{\text{mix}} \approx \Delta S_{\text{conf}} \#(S2)$$

$$\Delta S_{\text{conf}} = -R \left[ \left( \sum_{i=1}^n x_i \ln x_i \right)_{\text{cation-site}} + \left( \sum_{j=1}^m x_j \ln x_j \right)_{\text{anion-site}} \right] \#(S3)$$

where R is the molar gas constant,  $x_i$  and  $x_j$  represent the molar fractions of elements in the cation and anion sites, respectively.

### ***Electrochemical measurement parameters:***

All electrochemical tests of the three-electrode system with independent variables noted as "Potential (V vs. RHE)" are independent of each other. The ink should be fully shaken and continuously ultrasonicated for more than 30 minutes before the dispensing process. It should be dispensed within 10 minutes, and then the prepared electrode should be placed in a cool place to fully dry for 1 hour. Corresponding electrochemical tests have been conducted for 50 pre-cycles. The pre-cycle is scanned from 0 V to 1.2 V (vs. RHE) by cyclic voltammetry with a sweep rate of 100  $\text{mV s}^{-1}$ . The ORR-LSV process is scanned from 1.1 V to 0.1 V (vs. RHE) by the GC rotating disk electrode covered

with  $0.2 \text{ mg cm}^{-2}$  catalyst with a scan rate of  $10 \text{ mV s}^{-1}$  in  $\text{O}_2$  saturated  $0.1 \text{ M KOH}$ . The corresponding Tafel slope can be obtained from the LSV data. The potential of the Pt ring electrode in RRDE is fixed at  $1.2 \text{ V}$  (vs. RHE), and 50 cycles of pre-cycle scans of  $0 \text{ V}$  to  $1.2 \text{ V}$  (vs. RHE) are performed before the test. The fixed potential is  $0.7 \text{ V}$  (vs. RHE) for ORR long-term stability tests. The OER-LSV process scans from  $1.1 \text{ V}$  to  $1.8 \text{ V}$  (vs. RHE) through Ni-foam (untreated) covered with  $0.5 \text{ mg cm}^{-2}$  catalyst at a sweep rate of  $10 \text{ mV s}^{-1}$  in  $\text{O}_2$  saturated  $1.0 \text{ M KOH}$ . The corresponding Tafel slope is given by LSV data is obtained. The EIS process scans from high frequency  $1000000 \text{ Hz}$  to  $0.1 \text{ Hz}$ . The ZABs test process uses a two-electrode system for measurement in air atmosphere ( $\sim 21\% \text{ O}_2$ ). The Zn sheet is used as the auxiliary electrode and the reference electrode at the same time, and the hydrophobic carbon paper coated with  $1 \text{ g cm}^{-2}$  catalyst is used as the working electrode. The power density curve is measured by linear voltammetry, sweeping from  $1.5 \text{ V}$  to  $0.3 \text{ V}$ , with a sweep speed of  $20 \text{ mV s}^{-1}$ . The charge-discharge cycle stability test consists of 10 min of discharge and 10 min of charge, and the current density is  $10 \text{ mA cm}^{-2}$ .

### ***Calculation of electrochemical active surface area (ECSA):***

As the double layer capacitance ( $C_{dl}$ ) is proportional to the ECSA and determined from the corresponding cyclic voltammetry (CV) curves. The CV curves was test with the potential range of  $0.1 \sim 0.18 \text{ V}$  (vs.  $\text{HgO}|\text{Hg}$ ) at various scan rates of  $10, 20, 30, 40, 50, 60, 70 \text{ mV s}^{-1}$ . Then, the current density obtained from the CV curves at each scan rate was calculated by the formula  $\Delta j = j_1 - j_2$ .  $\Delta j/2$  at each scan rate was then linearly fitted by the least-squares method, and the slope value of the curve obtained was  $C_{dl}$ . In addition, catalysts that usually have a real surface area of  $1 \text{ cm}^{-2}$  generally have a specific capacitance value ( $C_s$ ) in the range of  $20 \sim 60 \text{ F cm}^{-2}$ , and we took  $C_s = 40 \text{ F cm}^{-2}$ <sup>[5, 6]</sup>, and then the final ECSA value is calculated by  $\text{ECSA} = C_{dl}/C_s$ .

### ***Calculation of specific activity:***

The specific activities of catalysts for the OER can be evaluated via normalizing the measured kinetic current by ECSA[5].

**Table S1.** The melting point and boiling point of materials[7]

| Elements | Fluoride melting point<br>[°C] | Fluoride boiling point<br>[°C] | Metal melting point<br>[°C] | Metal boiling point<br>[°C] |
|----------|--------------------------------|--------------------------------|-----------------------------|-----------------------------|
| Mn       | 930                            | 1820                           | 1244                        | 2095                        |
| Co       | 1127                           | 1400                           | 1494                        | 2927                        |
| Ni       | 1450                           | 1740                           | 1453                        | 2884                        |
| Cu       | 836                            | 1676                           | 1085                        | 2562                        |
| Zn       | 872                            | 1500                           | 420                         | 907                         |

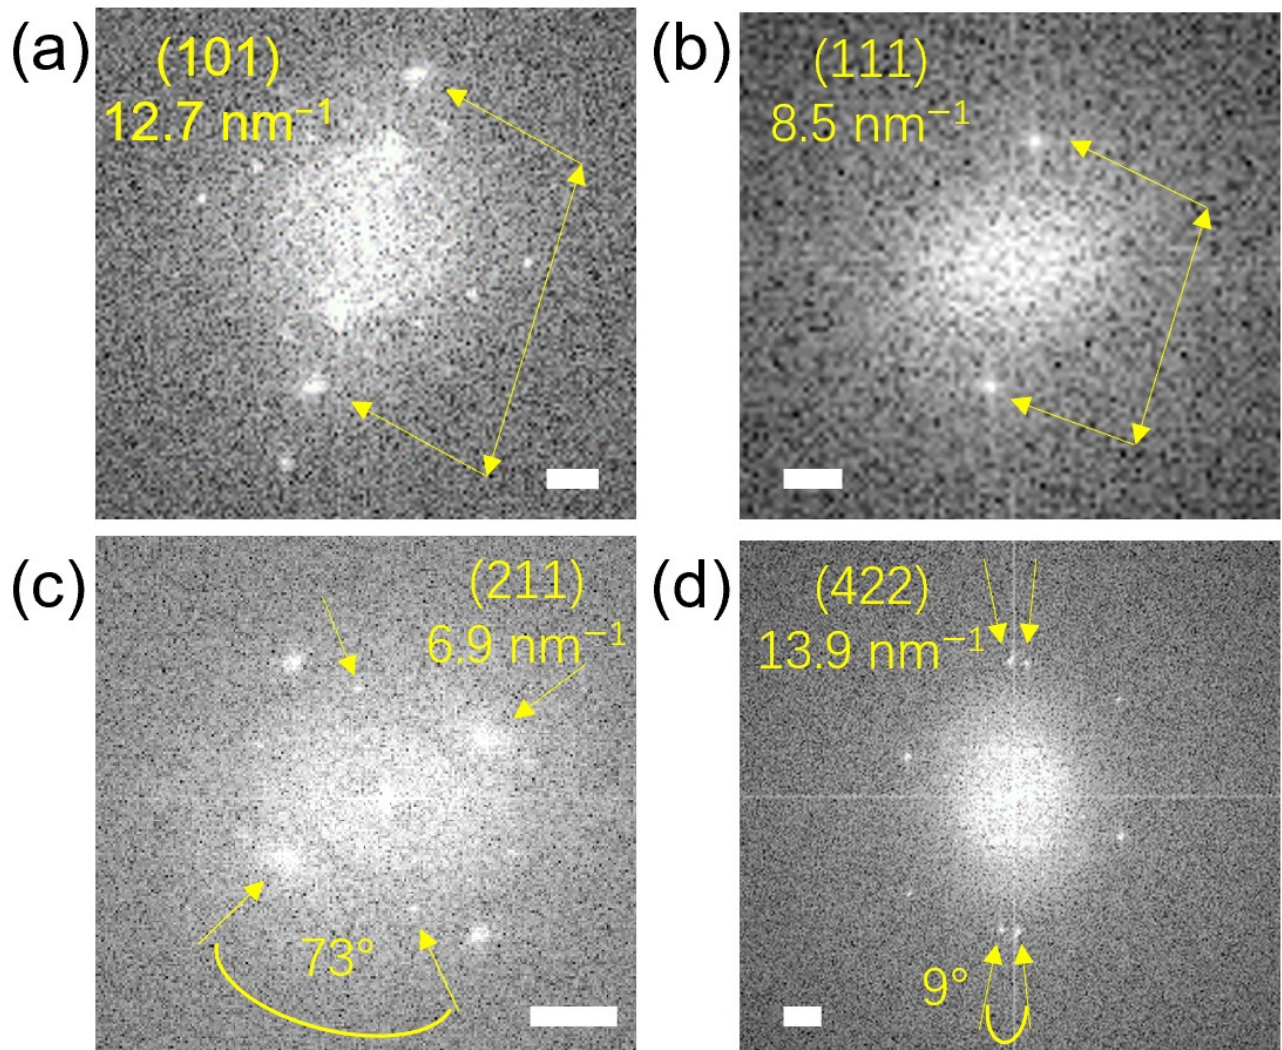

**Fig. S1.** The selected Area Electron Diffraction (SAED) corresponding to the selected area in **Fig. 2**. (a)  $(\text{MnNiCu})\text{F}_2$ -PCNFs, (b)  $(\text{MnNiCuCo})\text{F}_2$ -PCNFs, (c)  $(\text{MnNiCuZn})\text{F}_2$ -PCNFs, (d)  $(\text{MnNiCuCoZn})\text{F}_2$ -PCNFs.

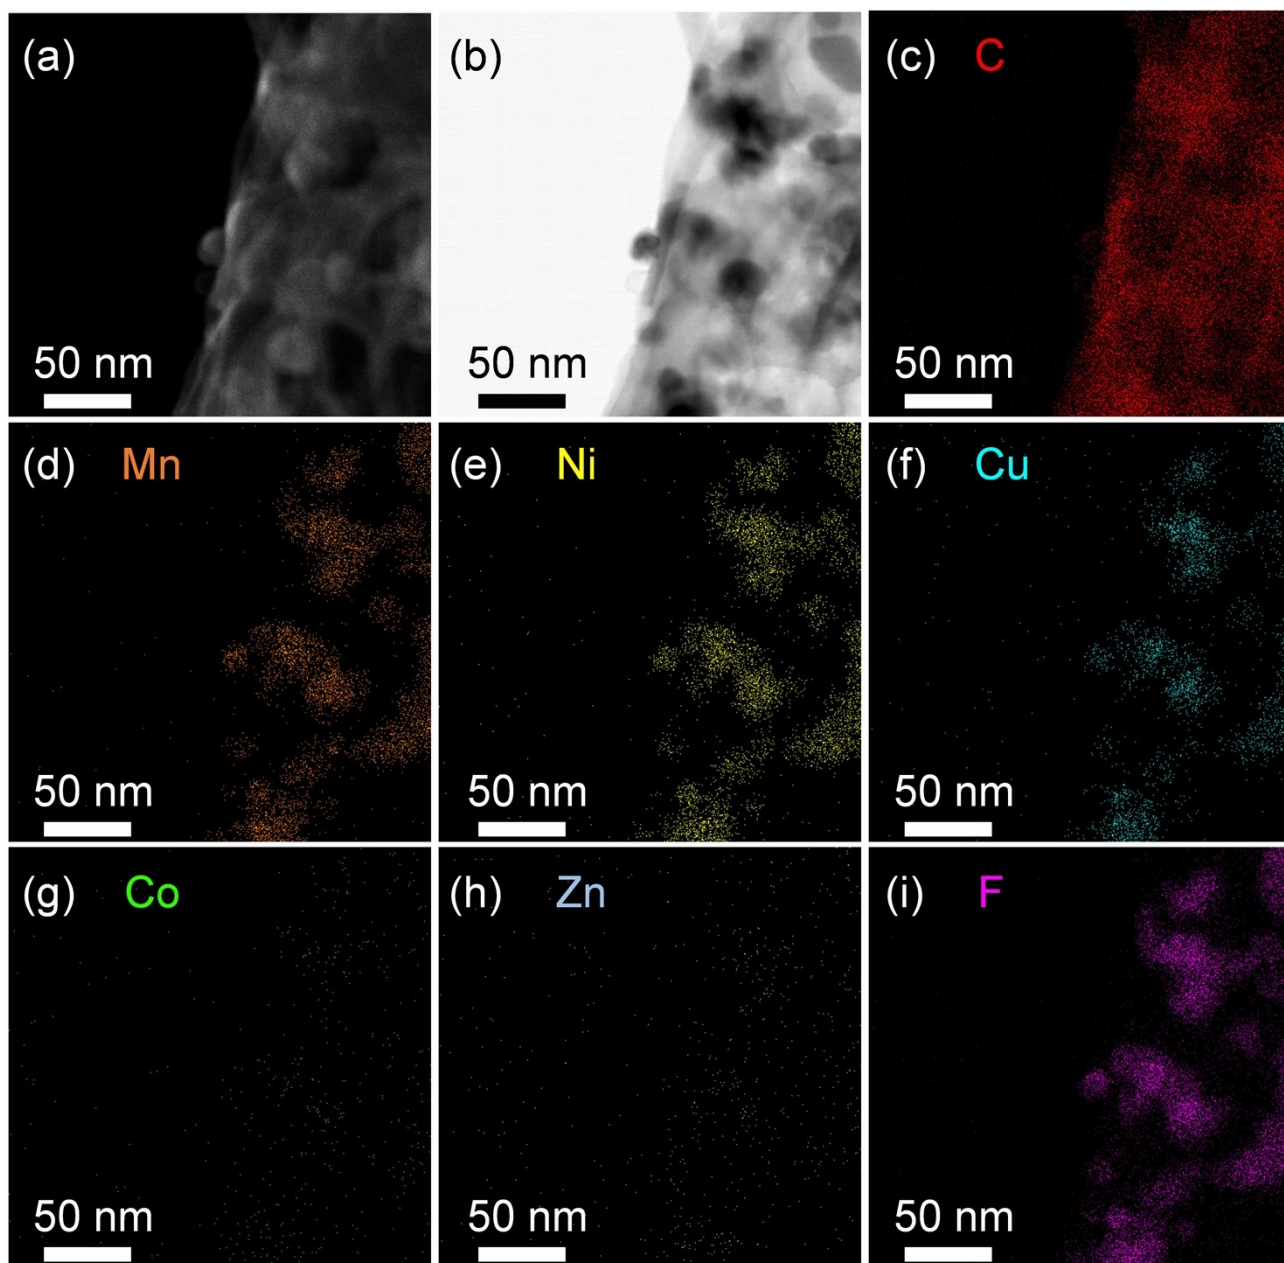

**Fig. S2.** The (a, b) STEM and (c-i) corresponding EDS surface scans of (MnNiCu)F<sub>2</sub>-PCNFs.



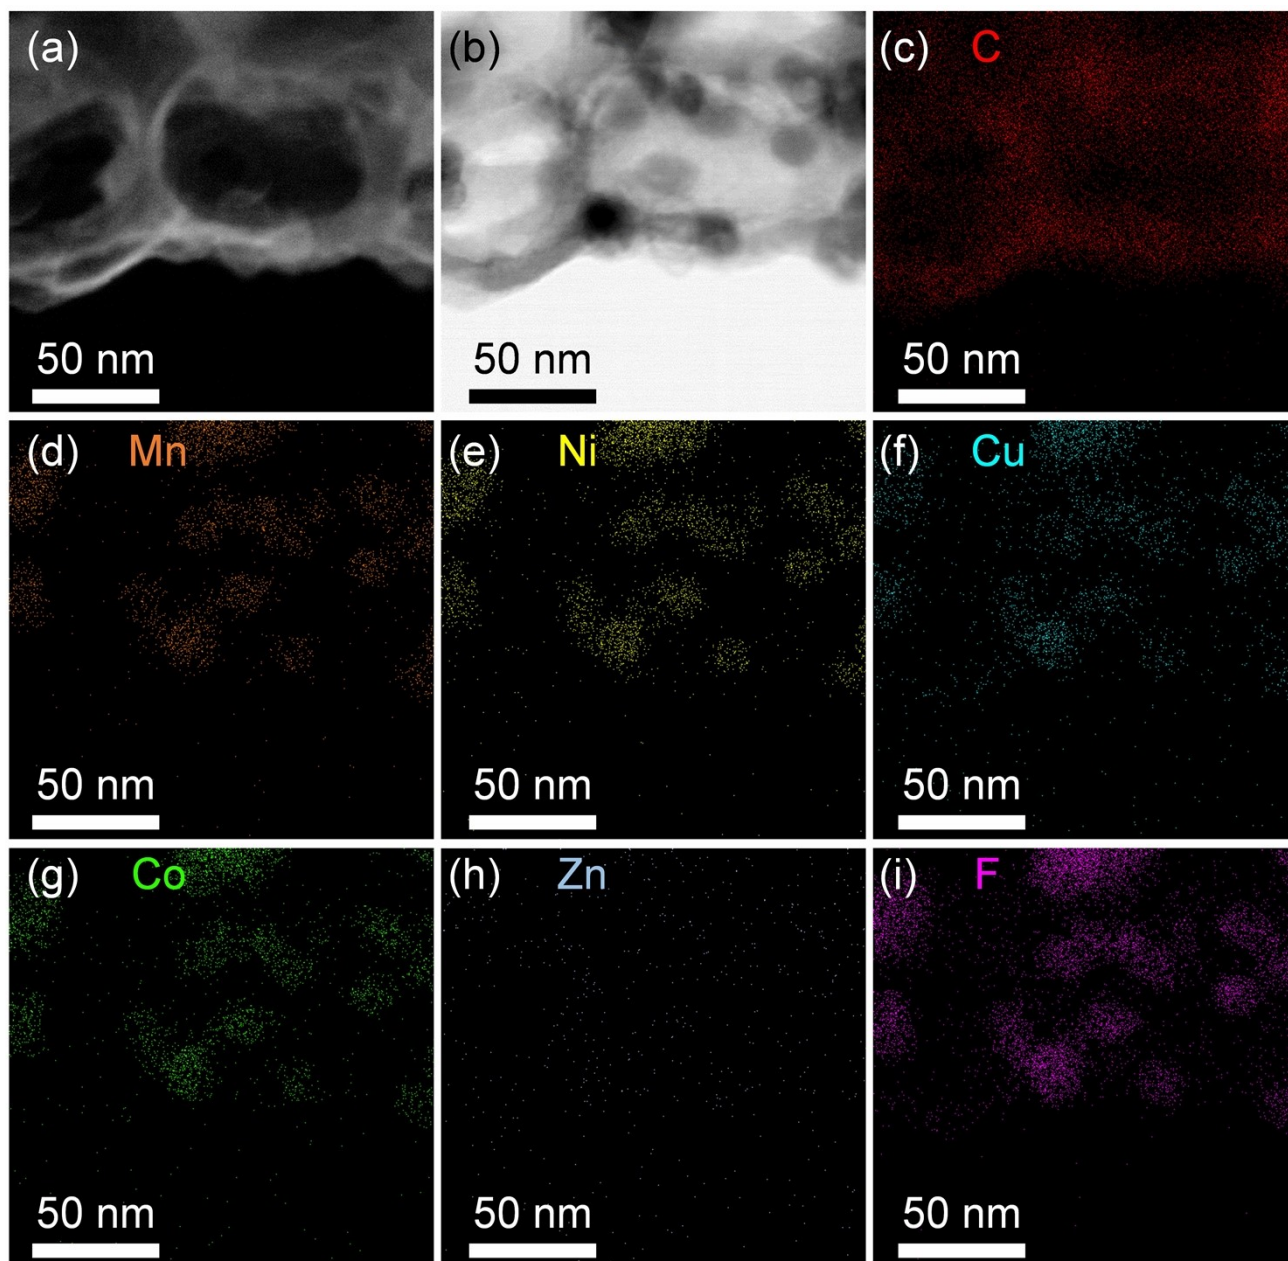

**Fig. S3.** The (a, b) STEM and (c-i) corresponding EDS surface scans of  $(\text{MnNiCuCo})\text{F}_2$ -PCNFs.

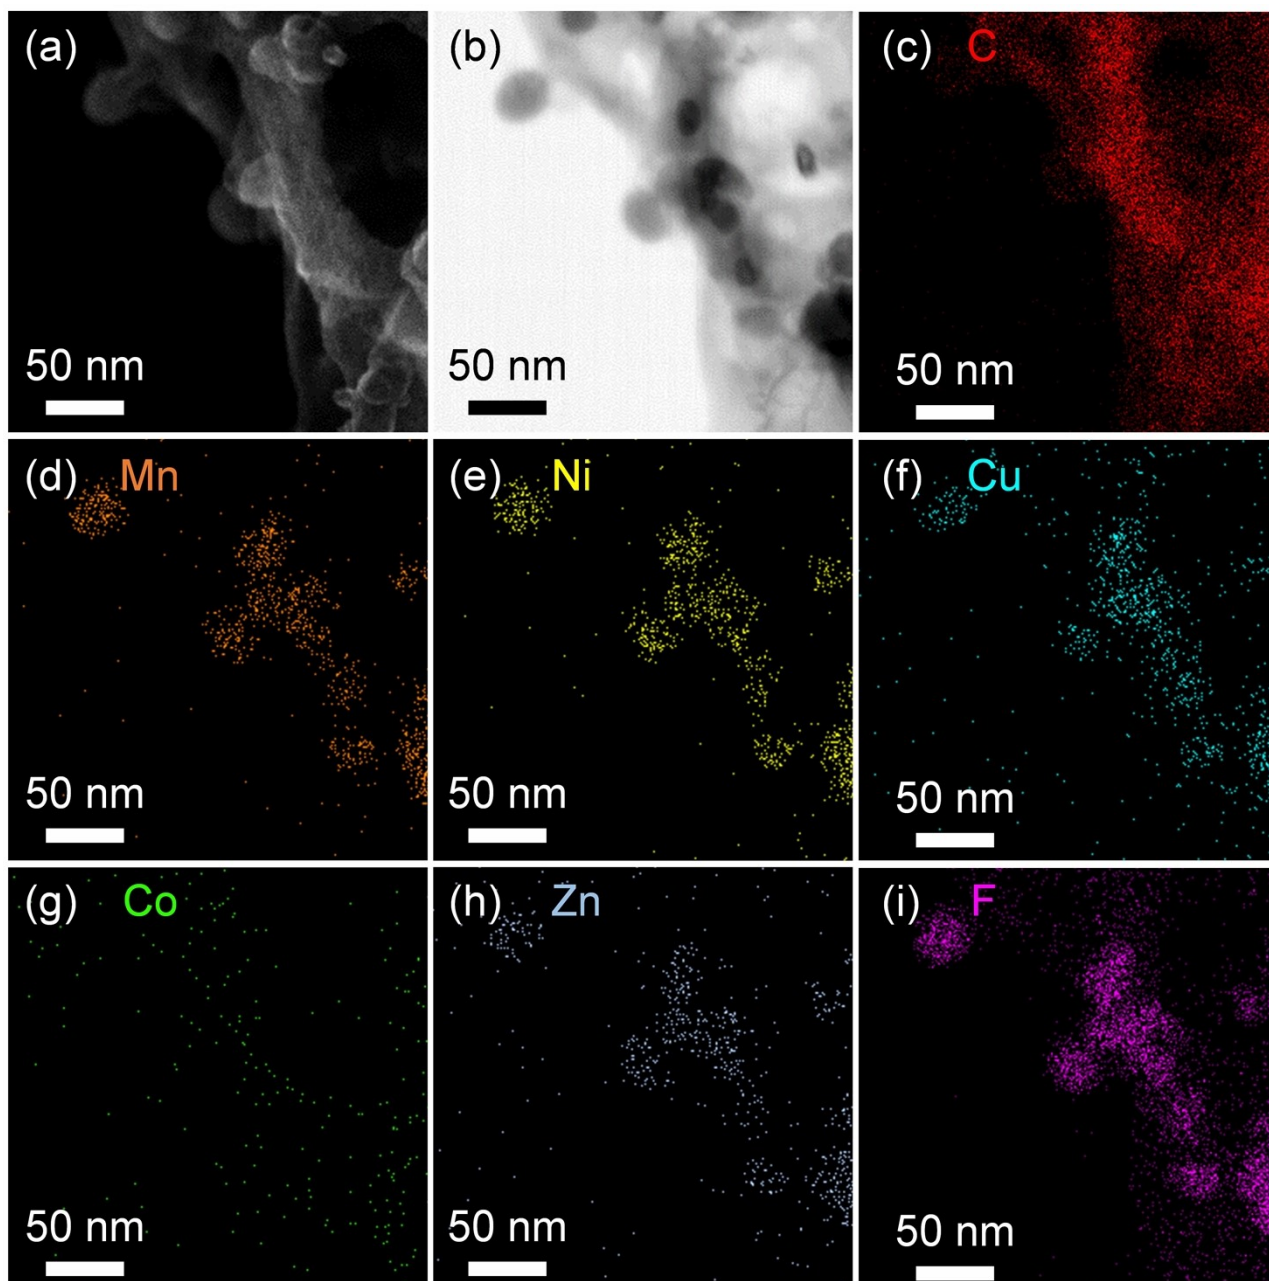

**Fig. S4.** The (a, b) STEM and (c-i) corresponding EDS surface scans of (MnNiCuZn)F<sub>2</sub>-PCNFs.

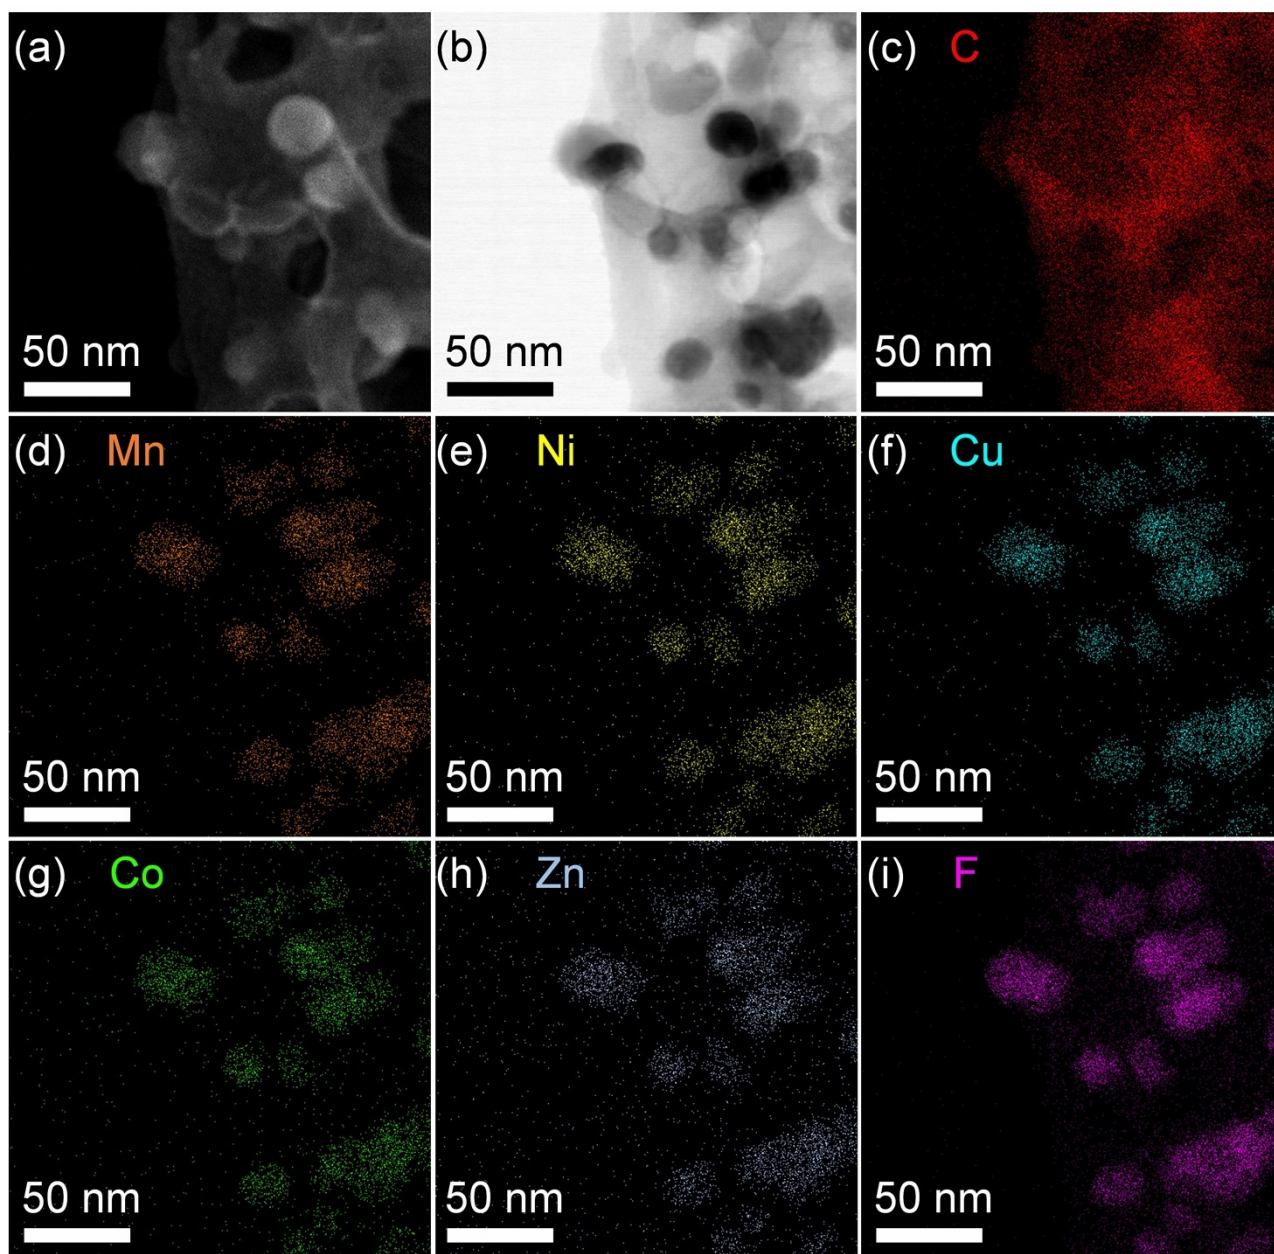

**Fig. S5.** The (a, b) STEM and (c-i) corresponding EDS surface scans of  $(\text{MnNiCuCoZn})\text{F}_2$ -PCNFs.

**Table S2.** Elemental composition of each sample

| Element | (MnNiCu)F <sub>2</sub> -PCNFs<br>[Atomic %] | (MnNiCuCo)F <sub>2</sub> -PCNFs<br>[Atomic %] | (MnNiCuZn)F <sub>2</sub> -PCNFs<br>[Atomic %] | (MnNiCuCoZn)F <sub>2</sub> -PCNFs<br>[Atomic %] |
|---------|---------------------------------------------|-----------------------------------------------|-----------------------------------------------|-------------------------------------------------|
| C       | 90.93                                       | 90.38                                         | 92.46                                         | 91.05                                           |
| F       | 6.61                                        | 5.46                                          | 5.85                                          | 6.39                                            |
| Mn      | 0.91                                        | 1.07                                          | 0.56                                          | 0.64                                            |
| Co      | -                                           | 1.01                                          | -                                             | 0.48                                            |
| Ni      | 0.83                                        | 1.09                                          | 0.42                                          | 0.54                                            |
| Cu      | 0.72                                        | 0.98                                          | 0.42                                          | 0.52                                            |
| Zn      | -                                           | -                                             | 0.27                                          | 0.38                                            |

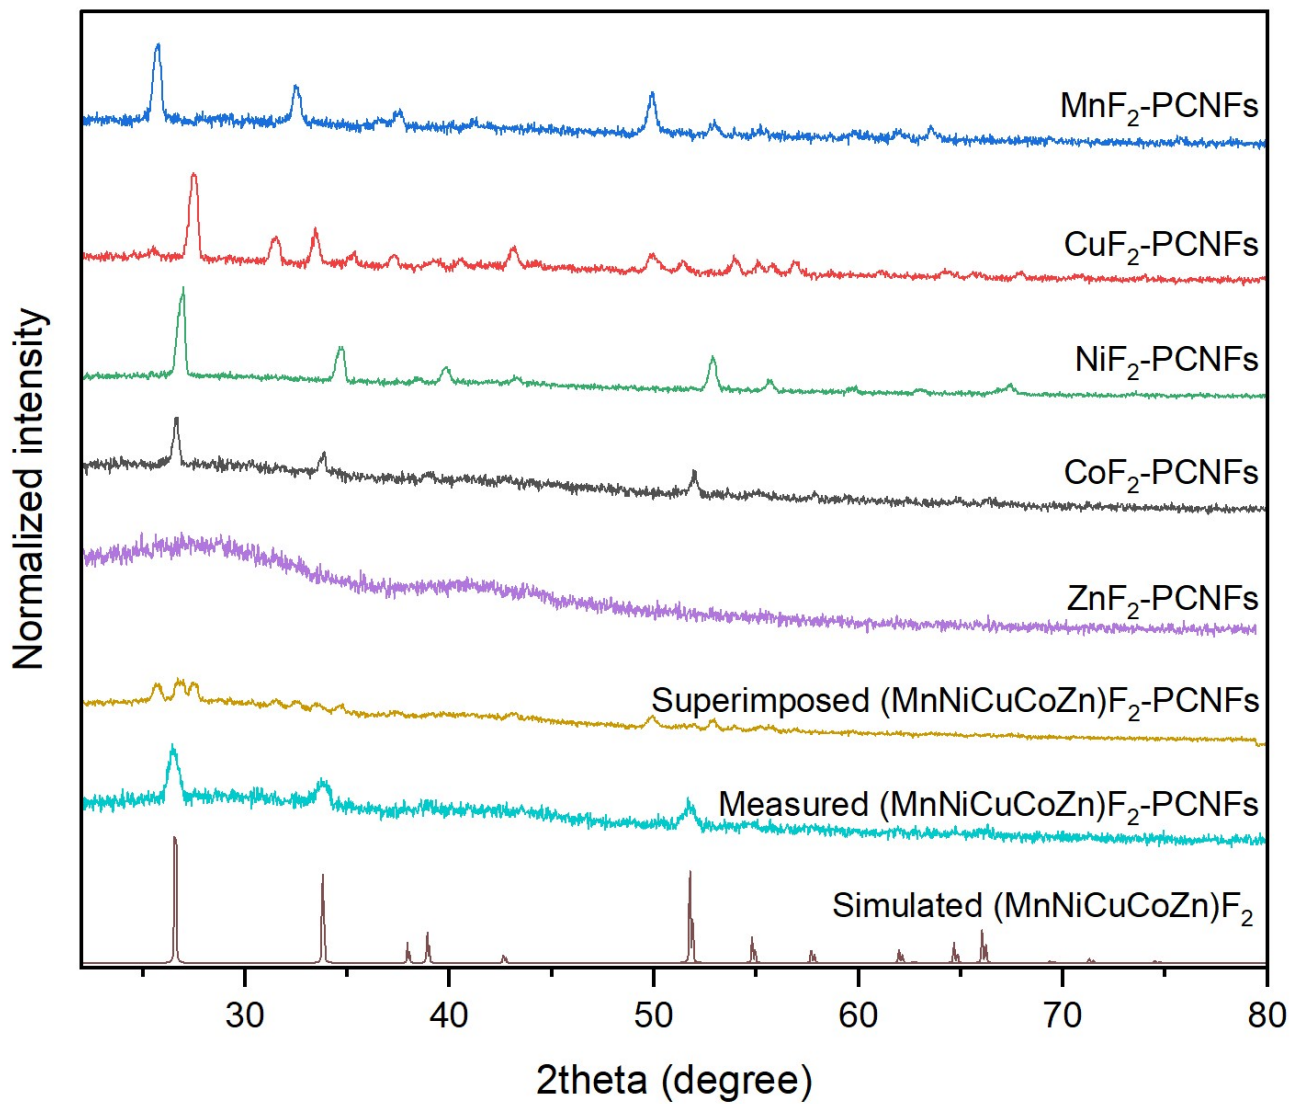

**Fig. S6.** Individually prepared single-metal fluoride composite PCNFs, superimposed XRD spectra, measured (MnNiCuCoZn)F<sub>2</sub>-PCNFs and simulated (MnNiCuCoZn)F<sub>2</sub>.

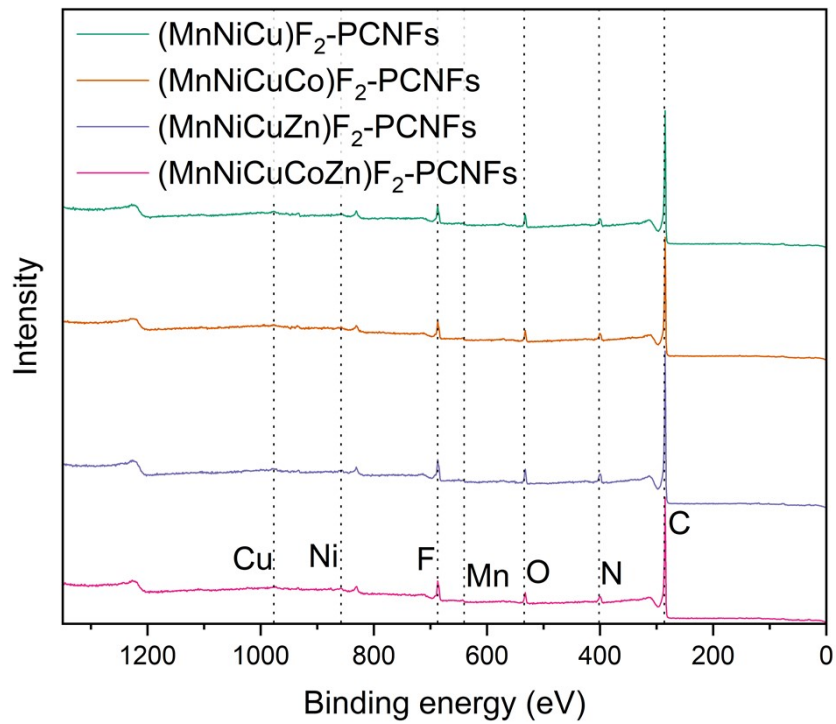

**Fig. S7.** The XPS spectra of (MnNiCu)F<sub>2</sub>-PCNFs, (MnNiCuCo)F<sub>2</sub>-PCNFs, (MnNiCuZn)F<sub>2</sub>-PCNFs, and (MnNiCuCoZn)F<sub>2</sub>-PCNFs

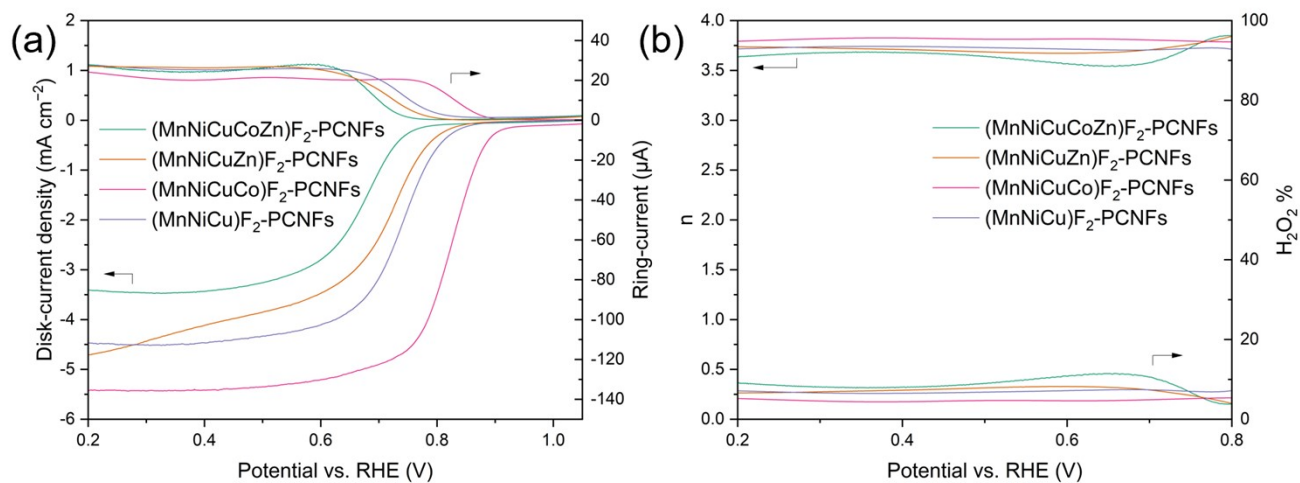

**Fig. S8.** (a) RRDE test, (b) corresponding electron transfer number and  $\text{H}_2\text{O}_2$  yield calculation.

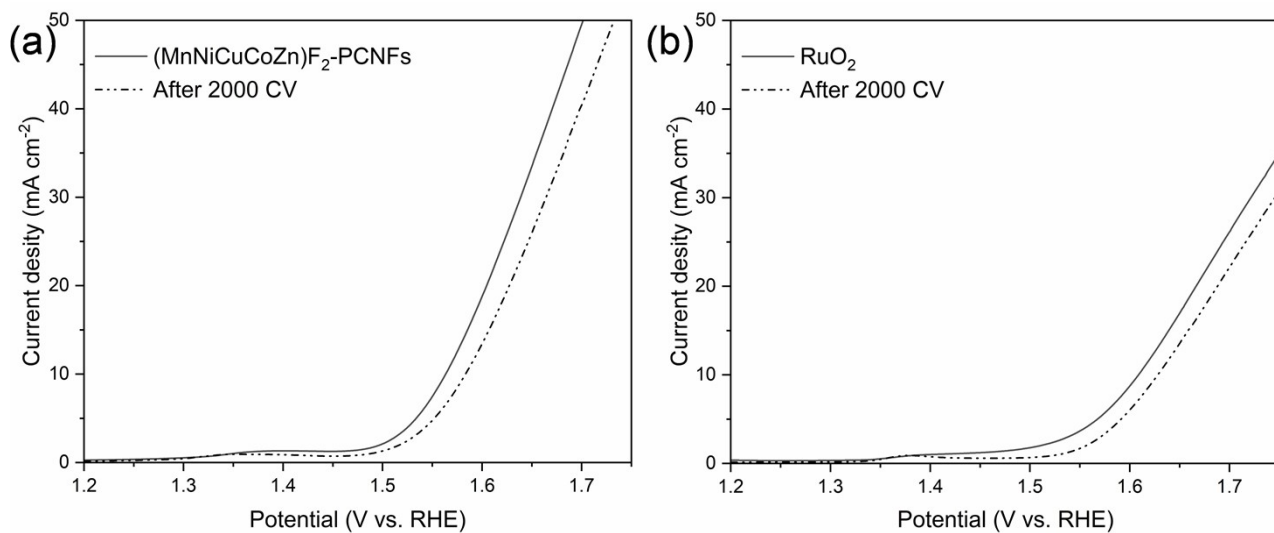

**Fig. S9.** The corresponding accelerated durability test (ADT) of OER.



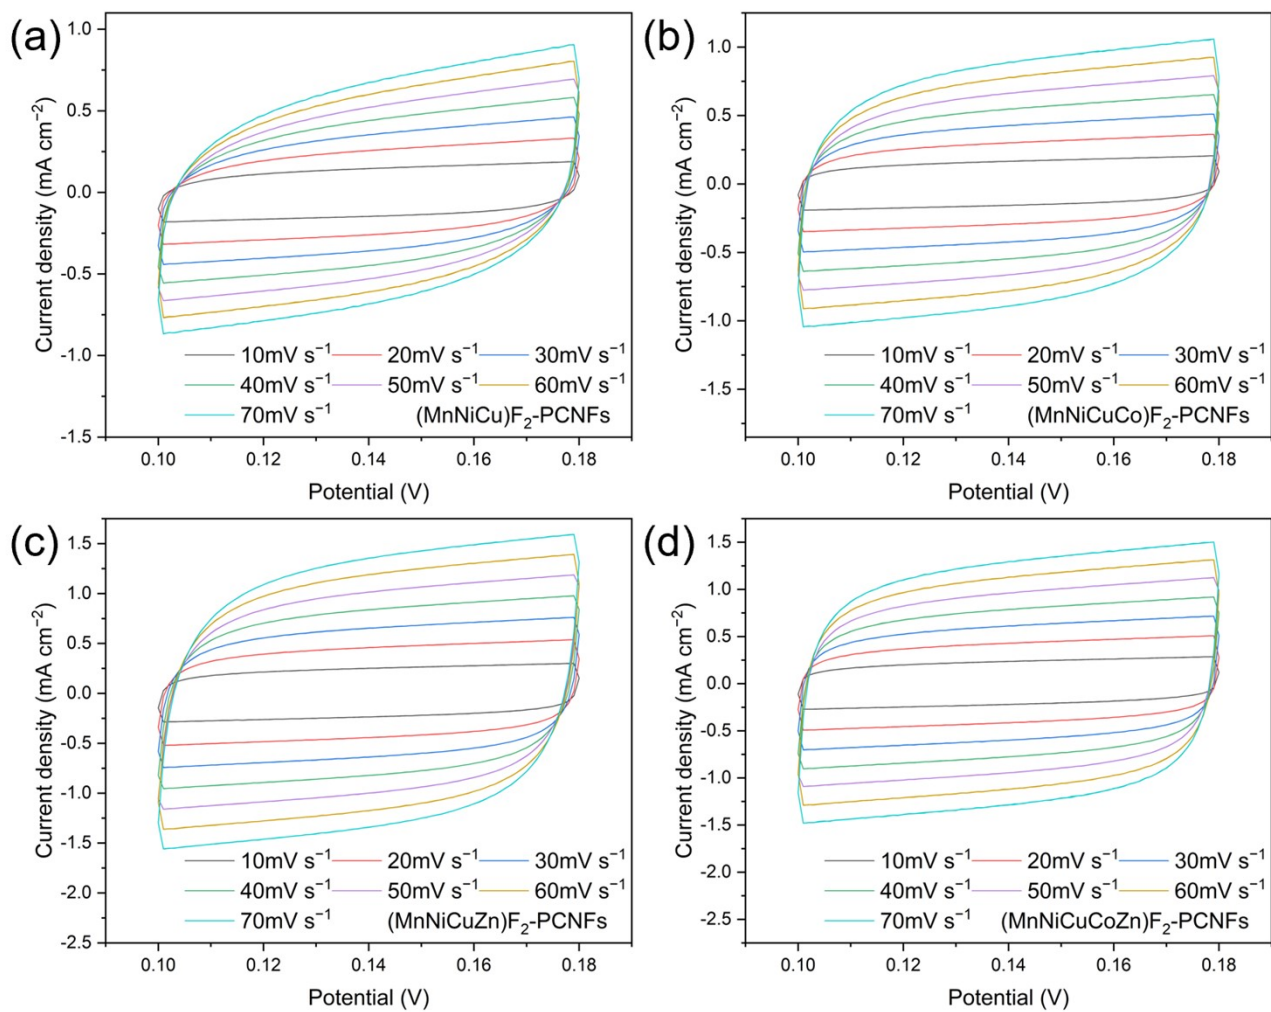

**Fig. S10.** CV curves of (a) (MnNiCu)F<sub>2</sub>-PCNFs, (b) (MnNiCuCo)F<sub>2</sub>-PCNFs, (c) (MnNiCuZn)F<sub>2</sub>-PCNFs, and (d) (MnNiCuCoZn)F<sub>2</sub>-PCNFs at different scan rates within the non-Faradaic current range.

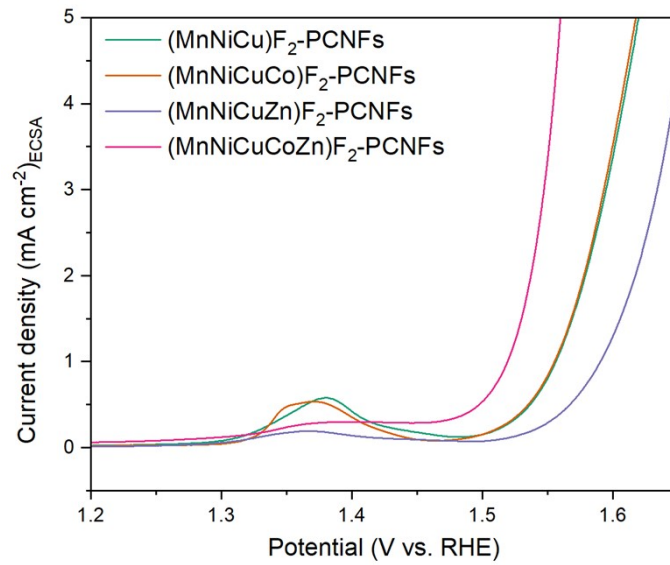

**Fig. S11.** ECSA-normalized activity of  $(\text{MnNiCu})\text{F}_2\text{-PCNFs}$ ,  $(\text{MnNiCuCo})\text{F}_2\text{-PCNFs}$ ,  $(\text{MnNiCuZn})\text{F}_2\text{-PCNFs}$ , and  $(\text{MnNiCuCoZn})\text{F}_2\text{-PCNFs}$

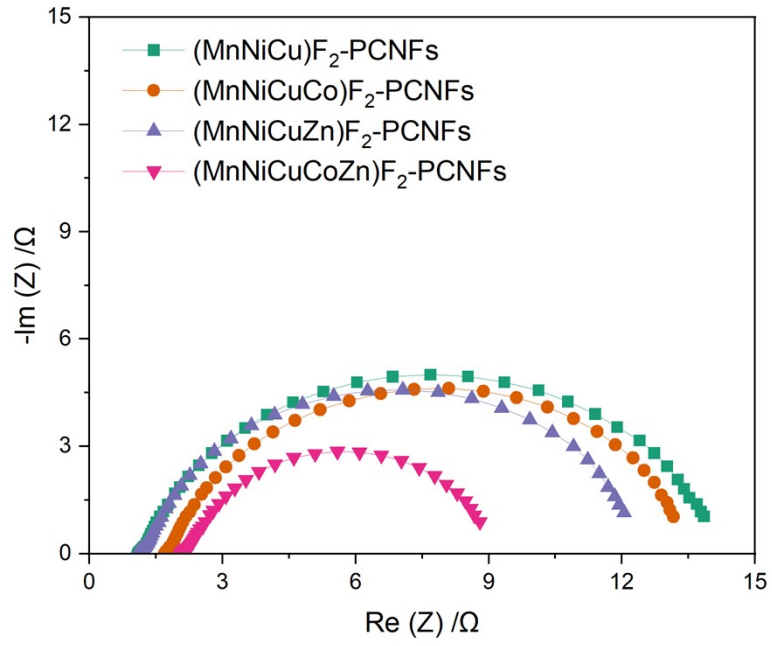

**Fig. S12.** Nyquist plots of  $(\text{MnNiCu})\text{F}_2\text{-PCNFs}$ ,  $(\text{MnNiCuCo})\text{F}_2\text{-PCNFs}$ ,  $(\text{MnNiCuZn})\text{F}_2\text{-PCNFs}$  and  $(\text{MnNiCuCoZn})\text{F}_2\text{-PCNFs}$ .

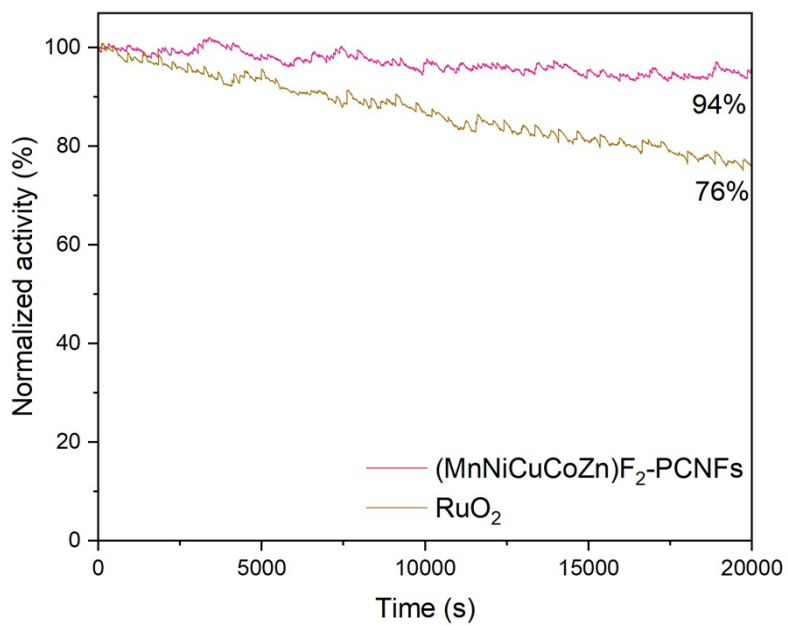

**Fig. S13.** Long-term stability for OER.

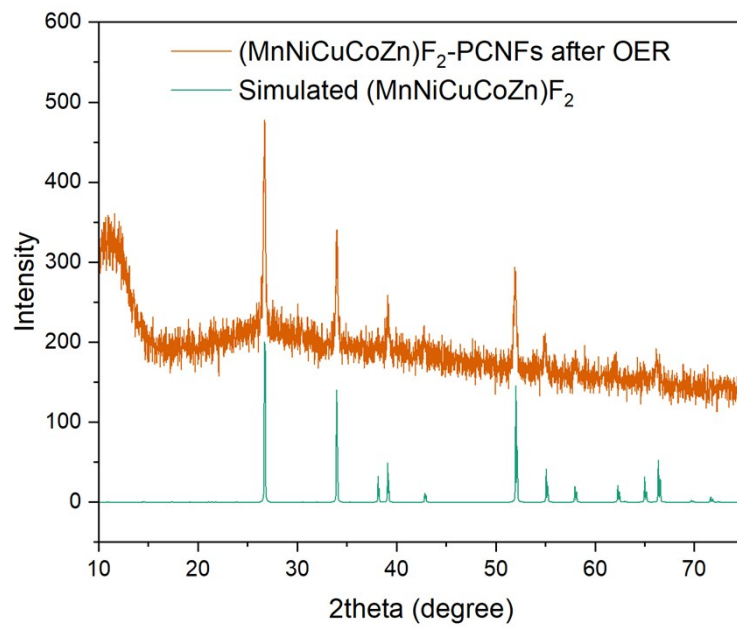

**Fig. S14.** The XRD spectra of (MnNiCuCoZn)F<sub>2</sub>-PCNFs after 20000 s OER process.

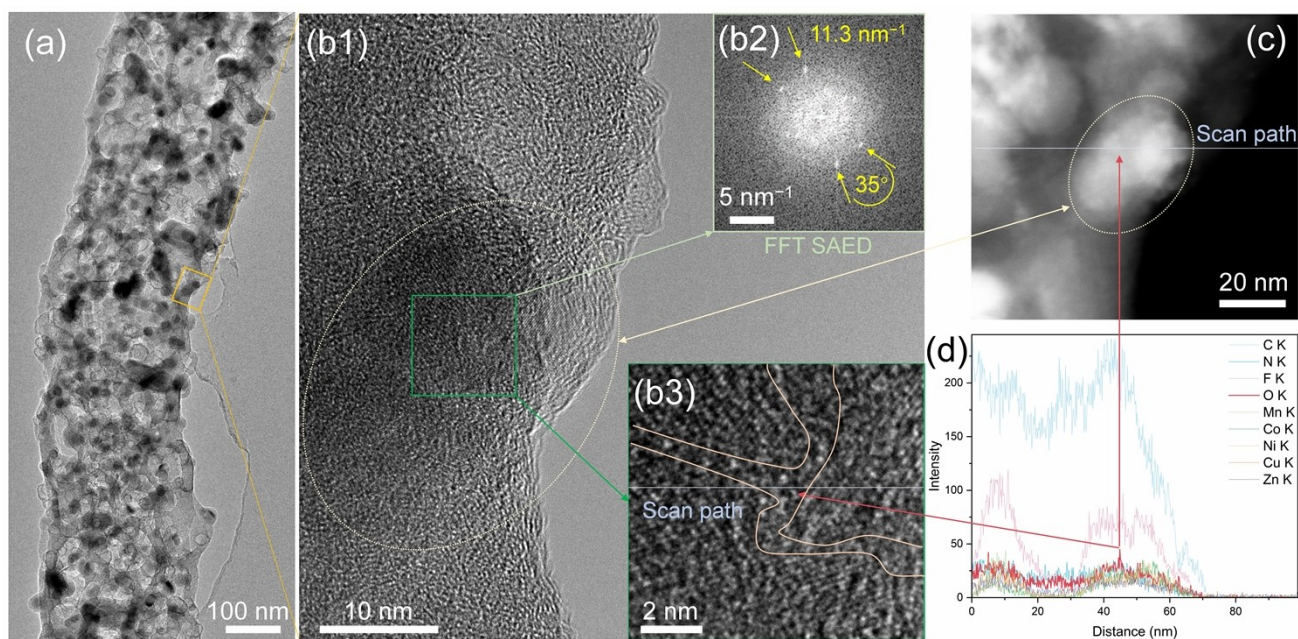

**Fig. S15.** The HR-TEM images of (MnNiCuCoZn)F<sub>2</sub>-PCNFs after 20000 s OER process. **(a)** TEM image, **(b1)** HR-TEM image, **(b2)** the fast Fourier transform (FFT) selected area electron diffraction (SAED) image, **(b3)** corresponding selected area HR-TEM images, **(c)** high angle annular dark field (HAADF) image and **(d)** corresponding linear scanning of EDS.

**Table S3.** The performance comparison of similar works.

| Catalysts                              | $\Delta E(E_{j=10}-E_{1/2})$<br>[V] | Peak power density<br>[mW cm <sup>-2</sup> ] | REF              |
|----------------------------------------|-------------------------------------|----------------------------------------------|------------------|
| Cu-Co-Mn-Ni-Fe                         | 0.92                                | 165                                          | [8]              |
| FeCoNiMoW                              | 0.75                                | 116.9                                        | [9]              |
| FeNiCrCoMn@CNTs                        | 0.7                                 | 128.6                                        | [10]             |
| PtFeCoNiMn                             | 0.724                               | 192.16                                       | [11]             |
| CrMnFeCoNi                             | 0.715                               | 116.5                                        | [12]             |
| CoFeNi@N-PCF                           | 0.7                                 | 203                                          | [13]             |
| Fe-Co-Cr@NC                            | 0.71                                | 121.6                                        | [14]             |
| Co/Zn/Mn@NC                            | 0.73                                | 163                                          | [15]             |
| <b>(MnNiCuCoZn)F<sub>2</sub>-PCNFs</b> | <b>0.688</b>                        | <b>206</b>                                   | <b>This work</b> |

## References

- [1] J. Yeh, Alloy design strategies and future trends in high-entropy alloys, *Journal of the Minerals Metals and Materials Society* 65(2013) (12) 1759-1771. <https://doi.org/10.1007/s11837-013-0761-6>.
- [2] B. Fultz, Vibrational thermodynamics of materials, *Prog. Mater. Sci.* 55(2010) (4) 247-352. <https://doi.org/10.1016/j.pmatsci.2009.05.002>.
- [3] C.M. Rost, E. Sacht, T. Borman, A. Moballegh, E.C. Dickey, D. Hou, J.L. Jones, S. Curtarolo, J.P. Maria, Entropy-stabilized oxides, *Nat. Commun.* 6(2015) 8485. <https://doi.org/10.1038/ncomms9485>.
- [4] A. Sarkar, L. Velasco, D. Wang, Q. Wang, G. Talasila, L. de Biasi, C. Kubel, T. Brezesinski, S.S. Bhattacharya, H. Hahn, B. Breitung, High entropy oxides for reversible energy storage, *Nat. Commun.* 9(2018) (1) 3400. <https://doi.org/10.1038/s41467-018-05774-5>.
- [5] Z. Zhu, L. Luo, Y. He, M. Mushtaq, J. Li, H. Yang, Z. Khanam, J. Qu, Z. Wang, M.S. Balogun, High-Performance Alkaline Freshwater and Seawater Hydrogen Catalysis by Sword-Head Structured Mo<sub>2</sub>N-Ni<sub>3</sub>Mo<sub>3</sub>N Tunable Interstitial Compound Electrocatalysts, *Adv. Funct. Mater.* (2023). <https://doi.org/10.1002/adfm.202306061>.
- [6] T. Xiong, Z. Zhu, Y. He, M.S. Balogun, Y. Huang, Phase Evolution on the Hydrogen Adsorption Kinetics of NiFe-Based Heterogeneous Catalysts for Efficient Water Electrolysis, *Small Methods* (2023) e2201472. <https://doi.org/10.1002/smt.202201472>.
- [7] J.A. Dean, N.A. Lange, *Lange's handbook of chemistry*, McGraw-Hill, inc.1998.
- [8] C. Madan, S.R. Jha, N.K. Katiyar, A. Singh, R. Mitra, C.S. Tiwary, K. Biswas, A. Halder, Understanding the evolution of catalytically active multi-metal sites in a bifunctional high-entropy alloy electrocatalyst for zinc-air battery application, *Energy Advances* 2(2023) (12) 2055-2068. <https://doi.org/10.1039/d3ya00356f>.
- [9] R. He, L. Yang, Y. Zhang, D. Jiang, S. Lee, S. Horta, Z. Liang, X. Lu, A. Ostovari Moghaddam, J. Li, M. Ibanez, Y. Xu, Y. Zhou, A. Cabot, A 3d-4d-5d High Entropy Alloy as a Bifunctional Oxygen Catalyst for Robust Aqueous Zinc-Air Batteries, *Adv. Mater.* (2023) e2303719. <https://doi.org/10.1002/adma.202303719>.
- [10] X. Cao, Y. Gao, Z. Wang, H. Zeng, Y. Song, S. Tang, L. Luo, S. Gong, FeNiCrCoMn High-Entropy Alloy Nanoparticles Loaded on Carbon Nanotubes as Bifunctional Oxygen Catalysts for Rechargeable Zinc-Air Batteries, *ACS Appl Mater Interfaces* 15(2023) (27) 32365-32375. <https://doi.org/10.1021/acsami.3c04120>.
- [11] M. Xie, X. Xiao, D. Wu, C. Zhen, C. Wu, W. Wang, H. Nian, F. Li, M.D. Gu, Q. Xu, MOF-mediated synthesis of novel PtFeCoNiMn high-entropy nanoalloy as bifunctional oxygen electrocatalysts for zinc-air battery, *Nano Research* (2024) <https://doi.org/10.1007/s12274-024-6526-4>. <https://doi.org/10.1007/s12274-024-6526-4>.
- [12] R. He, L. Yang, Y. Zhang, X. Wang, S. Lee, T. Zhang, L. Li, Z. Liang, J. Chen, J. Li, A. Ostovari Moghaddam, J. Llorca, M. Ibáñez, J. Arbiol, Y. Xu, A. Cabot, A CrMnFeCoNi high entropy alloy boosting oxygen evolution/reduction reactions and zinc-air battery performance, *Energy Storage Mater.* 58(2023) 287-298. <https://doi.org/10.1016/j.ensm.2023.03.022>.
- [13] M. Li, L. Zong, J. Zhao, K. Fan, F. Song, Q. Zhang, Z. Wang, L. Wang, The millisecond fabrication of medium-entropy alloy as a high-performance bifunctional electrocatalyst for ultralong-term rechargeable zinc-air batteries, *J. Alloys Compd.* 976(2024) 173183. <https://doi.org/10.1016/j.jallcom.2023.173183>.
- [14] R. Kumar, S. Kumar, S.G. Chandrappa, N. Goyal, A. Yadav, N. Ravishankar, A.S. Prakash, B. Sahoo, Nitrogen-doped carbon nanostructures embedded with Fe-Co-Cr alloy based nanoparticles as robust electrocatalysts for Zn-air batteries, *J. Alloys Compd.* 984(2024) 173862. <https://doi.org/10.1016/j.jallcom.2024.173862>.
- [15] S. Chen, H. Ren, Y. Qiu, C. Luo, Q. Zhao, W. Yang, Engineering bifunctional electrocatalysts for rechargeable Zn-Air battery by confining Co-Zn-Mn in flower-structured carbon, *J. Power Sources* 573(2023) 233116. <https://doi.org/10.1016/j.jpowsour.2023.233116>.
